# Supplementary material
Source: PubMed Central journal article supplement (PMC9115727)
Supplement: NIHMS1797578-supplement-sup.pdf [file NIHMS1797578-supplement-sup.pdf]

---

**Supplementary information**

---

**A spatiotemporal molecular switch governs  
plant asymmetric cell division**

---

In the format provided by the  
authors and unedited

Supplementary Information for

**A Spatiotemporal Molecular Switch Governs Plant Asymmetric Cell Division**

Xiaoyu Guo<sup>1</sup>, Chan Ho Park<sup>2</sup>, Zhi-Yong Wang<sup>2</sup>, Bryce E. Nickels<sup>1,3</sup>, Juan Dong<sup>1,4,\*</sup>

Correspondence to: Juan Dong (dong@waksman.rutgers.edu)

**This file includes:**

Supplementary Figures 1-2  
Supplementary Table 2

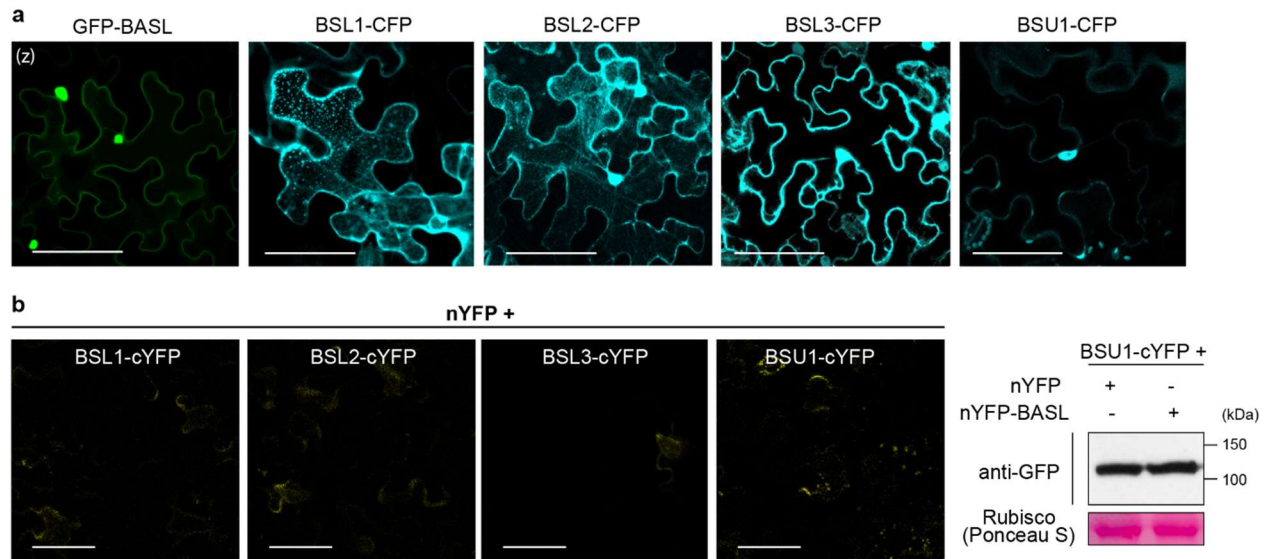

**Supplementary Fig. 1 | BSL1, BSL2 and BSL3 Physically Interact with BASL in *Planta***

**a**, Representative confocal images show subcellular localization of indicated proteins in *N. benthamiana* leaf epidermal cells. BASL (green), nuclear and cytoplasmic; BSL1 (cyan), cell membrane and cytoplasmic puncta; BSL2 (cyan), nuclear and cytoplasmic; BSL3 (cyan), nuclear and cytoplasmic; BSU1 (cyan), predominantly nuclear and weakly cytoplasmic. (z), z-staked confocal images.

**b**, Negative controls for Fig. 1c BiFC assays testing BSL-BASL interaction in *N. benthamiana* leaf epidermal cells. Confocal images show no significant YFP signals were recovered when nYFP was coupled with BSL-cYFP fusions. nYFP and cYFP, N- and C-terminal domain of the split YFP, respectively. Western blots show BSU1-cYFP protein was detected with anti-GFP when BSU1-cYFP co-expressed with nYFP or nYFP-BASL in *N. benthamiana* leaves. Data represent results of experiments repeated three times. Protein loading is shown by Ponceau S staining (bottom). Scale bars in (a-b), 50  $\mu$ m.

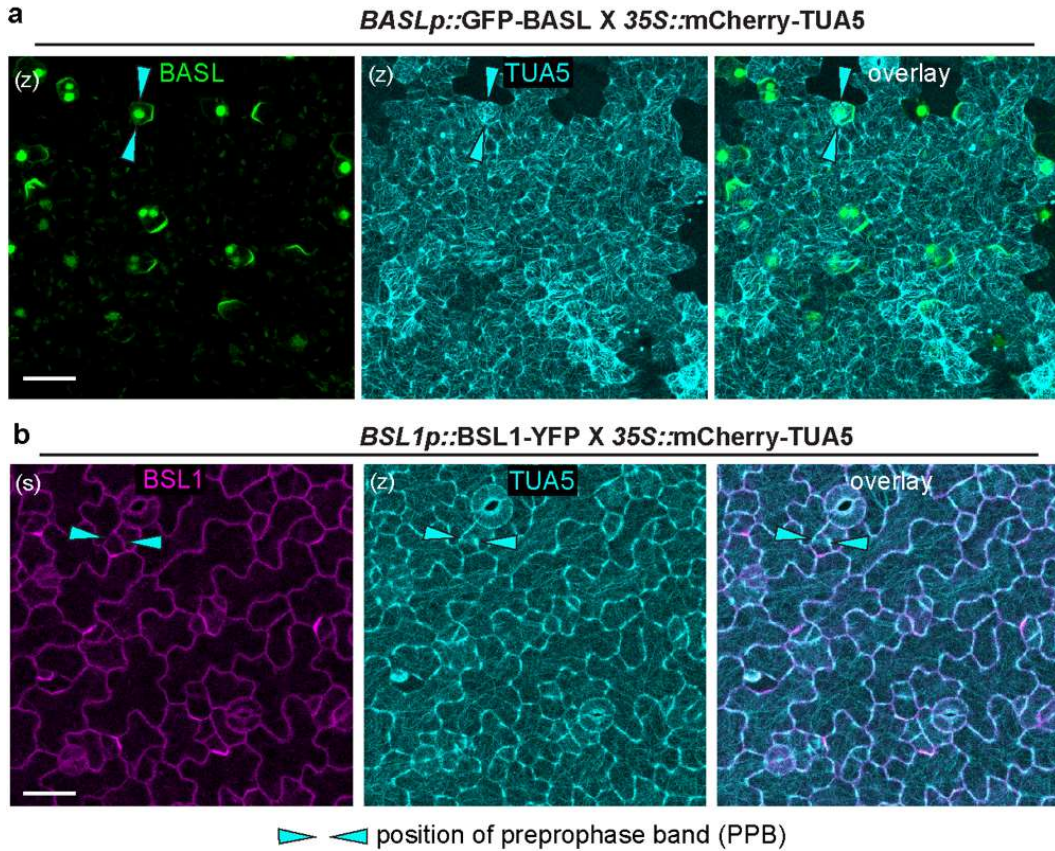

**Supplementary Fig. 2 | Determination of Polarization Timing for BASL and BSL1**

**a-b**, Co-expression of the native promoter driven GFP-BASL (green)(**a**) or BSL1-YFP (magenta)(**b**) with the microtubule marker mCherry-TUA5 (cyan, driven by the ubiquitous 35S promoter) in 60-hpg adaxial cotyledon epidermis in *Arabidopsis*. The expression of the microtubule marker mCherry-TUA5 allows the visualization of the preprophase band (PPB) (cyan arrowheads) that forms at the G2 phase of the cell cycle. Scale bar, 25  $\mu$ m. (z), images are z-projected. (s), single optional sections.

## Supplementary Tables

**Table S2.** List of primers used in this study

The name and sequence of these primers was displayed in left. The purposes of these primers were listed in right. F, forward; R, reverse.

| Name               | Primers                                          | Purpose                                                            |
|--------------------|--------------------------------------------------|--------------------------------------------------------------------|
| BSL1-F-NotI        | GCTCCGCGGCCGCC<br>ATGGGCTCGAAGCCTTG              | for pENTR-D1/BSL1-CDS and genomic, overexpression lines, Y2H, BiFc |
| BSL1-R-Ascl(-stop) | A GGCGCGCCC<br>GATGTATGCAAGCGAGCTTCTG            |                                                                    |
| BSL2-F-NotI        | GCTCCGCGGCCGCC<br>ATGGATGAAGATTCGTCTATGG         | for pENTR-D1/BSL2-CDS and genomic, overexpression lines, Y2H, BiFc |
| BSL2-R-Ascl(-stop) | A GGCGCGCCC<br>CATCCAAGCCAGAGAACC                |                                                                    |
| BSL3-F-NotI        | GCTCCGCGGCCGCC<br>ATGGATTTGGATTCTTCAATG          | for pENTR-D1/BSL3-CDS and genomic, overexpression lines, Y2H, BiFc |
| BSL3-R-Ascl(-stop) | A GGCGCGCCC<br>TATCCAAGCAAGAGAGC                 |                                                                    |
| BSU1-F-NotI        | GCTCCGCGGCCGCC<br>ATGGCTCCTGATCAATCTTATC         | for pENTR-D1/BSU1-CDS and genomic, overexpression lines, Y2H, BiFc |
| BSU1-R-Ascl(-stop) | A GGCGCGCCC<br>TTCACCTTGACTCCCCTC                |                                                                    |
| BSL1 promoter-F    | GCTCCGCGGCCGCC<br>ACTCAGTTGCATTGAATTTGAC         | for pENTR-D1/BSL1 promoter-genomic                                 |
| BSL1 promoter-R    | GCTCCGCGGCCGCC<br>TGGAACCACCTTTACGGGTATAA<br>ATC |                                                                    |
| BSL2 promoter-F    | GCTCCGCGGCCGCC<br>TTATCAAATTGTAGTCCATCCAA<br>G   | for pENTR-D1/BSL2 promoter-genomic                                 |
| BSL2 promoter-R    | GCTCCGCGGCCGCC<br>TATCAAAAAGCTTCAAAAGTGG         |                                                                    |
| BSL3 promoter-F    | GCTCCGCGGCCGCC<br>TTCGGTCTTGATGGAACG             | for pENTR-D1/BSL3 promoter-genomic                                 |
| BSL3 promoter-R    | GCTCCGCGGCCGCC<br>ATTTTTCACAAACCCTAAATTCGTC      |                                                                    |
| BSU1 promoter-F    | GCTCCGCGGCCGCC<br>AAACCACTGACATCTCTTCATC         | for pENTR-D1/BSU1 promoter-genomic                                 |
| BSU1 promoter-R    | GCTCCGCGGCCGCC<br>AACACAATATTTTGTGGTGG           |                                                                    |
| BIN2cds-F-NotI     | GCTCCGCGGCCGCC<br>ATGGCTGATGATAAGGAGATG          | for overexpression lines, BiFc                                     |
| BIN2pro-F-NotI     | GCTCCGCGGCCGCC<br>CTCGGTTATACAATGAGGTTATC        | for pENTR-D1/BIN2 promoter-genomic                                 |
| BIN2-R-Ascl(-stop) | A GGCGCGCCC<br>AGTTCCAGATTGATTCAAGAAG            |                                                                    |
| BSL1D584N-F        | CAAATTGCCCATGGAGATTGCC<br>AAATACTTTGATAGGA       | point mutation                                                     |

|                         |                                             |                              |
|-------------------------|---------------------------------------------|------------------------------|
| BSL1D584N-R             | TCCTATCAAAGTATTTGGCAATC<br>TCCATGGGCAATTTGG |                              |
| BSL1cds-F-SmaI          | CC CCCGGG<br>ATGGGCTCGAAGCCTTG              | Protein fusion with GST      |
| BSL1cds-F-XbaI          | GCTCTAGA<br>ATGGGCTCGAAGCCTTG               | Protein fusion with MBP      |
| BSL1cds-R-Sall(-stop)   | GC GTCGAC<br>GATGTATGCAAGCGAGCTTCTG         | Protein fusion               |
| BSL2cds-F-EcoRI         | CG GAATTC<br>ATGGATGAAGATTCGTCTATGG         | Protein fusion with MBP, GST |
| BSL2cds-R-Sall(-stop)   | GC GTCGAC<br>CATCCAAGCCAGAGAACC             |                              |
| BSL3cds-F-XbaI          | GCTCTAGA<br>ATGGATTTGGATTCTTCAATG           | Protein fusion with MBP      |
| BSL3-R-Sall(-stop)      | GC GTCGAC<br>TATCCAAGCAAGAGAGC              |                              |
| BSU1-F-EcoRI            | CG GAATTC<br>ATGGCTCCTGATCAATCTTATC         | Protein fusion with MBP, GST |
| BSU1-R-Sall(-stop)      | GC GTCGAC<br>TTCACCTTGACTCCCCTC             |                              |
| MBP-YDA F               | C GAGCTC<br>ATGCCTTGGTGGAGTAAATC            | Protein fusion with MBP      |
| MBP-YDA R               | CC AAGCTT<br>GGGCCTCTGTTTGTTGATC            |                              |
| pET28a-BASL F           | CG GAATTC<br>ATGGCTTCACAGTGGACAATAC         | Protein fusion               |
| pET28a-BASL(-Stop) R    | CC CTCGAG<br>GAATCTACAACATTGGAACC           |                              |
| BIN2-F EcoR1            | CG GAATTC<br>ATGGCTGATGATAAGGAGATG          | Protein fusion with GST      |
| BIN2cds-R-NotI(-stop)   | GCTCCGCGGCCGCC<br>AGTTCCAGATTGATTCAAGAAG    |                              |
| SALK_051383(BSL1)<br>LP | TGATTAAATCTTGTCACGCC                        | Mutant genotyping            |
| SALK_051383(BSL1)<br>RP | GCTTCATCCGAGAGCTGTATG                       |                              |
| SALK_147279(BSL1)<br>LP | GACCTCGAAACTGGAAACCTC                       | Mutant genotyping            |
| SALK_147279(BSL1)<br>RP | TAGGGGTGATTTACCCCAAAC                       |                              |
| SALK_055335(BSL2)<br>LP | CATTAGCAAAGTTCTGCCAGC                       | Mutant genotyping            |
| SALK_055335(BSL2)<br>RP | GTTCCAGAGCAGATGGAGATG                       |                              |
| WiscDsLox245G08-LP      | TGAAGATCGTTGTTGTTGCAG                       | Mutant genotyping            |
| WiscDsLox245G08-RP      | AAACTTGTGACATCAGTGGCC                       |                              |
| SALK_071689(BSL3)<br>LP | CAAACATTTGAAAGGGTACGATG                     | Mutant genotyping            |

|                      |                               |                          |
|----------------------|-------------------------------|--------------------------|
| SALK_071689(BSL3) RP | AAAACATACGAATGCCAGCAC         |                          |
| SALK_072437(BSL3) LP | CCTGCAAAATATCAATGCTTAG        | Mutant genotyping        |
| SALK_072437(BSL3) RP | TAATGCACTTTTTGGTTTCCG         |                          |
| SALK_030721(BSU1) LP | ACGTTCCACTTCAACATGGAG         | Mutant genotyping        |
| SALK_030721(BSU1) RP | TCTTTAACCATGCTTCGAACC         |                          |
| SAIL_101_H03 LP      | TCAACAAAGGGTCCACAACCTC        | Mutant genotyping        |
| SAIL_101_H03 LP      | TGTCCACTTCCTGGTCAAAAC         |                          |
| BSL1 C-LP            | GACGACGCTTGGATGCAGGAGC<br>TG  | RT-PCR, C to 3'utr 279bp |
| BSL1 3'utr-RP        | CTATACCATTCTCACTCTCTGGT       |                          |
| BSL2-RT LP           | GAAGACACATGGATGCAGGAGC<br>T   | RT-PCR, C to 3'utr 490bp |
| BSL2-RT RP           | CACCTAATCAACCATTACCATTC       |                          |
| BSL3-RT LP           | AGAGGATACATGGATGCAGGAG<br>TTA | RT-PCR, C to 3'utr 624bp |
| BSL3-RT RP           | CAAACGACCAAACACACCTCTCT       |                          |
| BSU1Ct-RT            | CTCCCATCTCATCTTCAG            | RT-PCR, C to 3'utr 225bp |
| BSU1 3'utr-R         | CCTCTGCCAATACCAAATAG          |                          |
| BSL1-qPCR-R          | CCTCCCTCAATAGCGGTGGCG         | qPCR                     |
| BSL2-qPCR-R          | GCTCTTGCCAACAACCGCA           | qPCR                     |
| BSL3-qPCR-R          | CTGTTGCTGCTGTTGTTG            | qPCR                     |
| BASL-qPCR-F          | CTCTGATAAATCTAGCGGGTC         | qPCR                     |
| BASL-qPCR-R          | CTACAACATTGGAACCCTAAAG        | qPCR                     |
| BIN2-qPCR-F          | GTGACTTTGGCAGTGCGAAAC         | qPCR                     |
| BIN2-qPCR-R          | CAGCATTTTCTCCGGGAAATAAT<br>GG | qPCR                     |
